# Supplementary material for: The Effects of Dairy Intake on Insulin Resistance: A Systematic Review and Meta-Analysis of Randomized Clinical Trials
Source: PubMed Central journal article supplement (PMC6769921; doi:10.3390/nu11092237), 2019-09-17
Supplement: nutrients-11-02237-s001.pdf [file nutrients-11-02237-s001.pdf]

# SUPPLEMENT

## TABLE AND FIGURES

**Table S1. Randomized Controlled Trials of Dairy Intake not included in the Meta-Analysis**

| Study Author, Year   | Sample size            | Sex            | Age mean± SD or range (years) | BMI mean± SD or range (kg/m <sup>2</sup> ) | Country of origin | Study duration (weeks) | Findings Intervention vs. Control               |
|----------------------|------------------------|----------------|-------------------------------|--------------------------------------------|-------------------|------------------------|-------------------------------------------------|
| Agrawal, 2011 [23]   | I=12<br>C=12           | 71%M<br>29%F   | 16.7±8.9                      | I=15.8±2.4<br>C=15.8±3.0                   | India             | 108                    | ↓ BMI<br>↔ Insulin                              |
| Anderson, 2005 [16]  | I=39<br>C=51           | 12%M<br>88%F   | I=47.6±9.4<br>C=47.3±9.4      | 27-40                                      | United States     | 12                     | ↔ Body Weight<br>↔ WC                           |
| Alonso, 2009* [33]   | I=23<br>C=22           | 51% M<br>49% F | I= 19.9±1.4<br>C=19.9±1.6     | I=23.4±3.5<br>C=23.7±3.7                   | Spain             | 20                     | ↑ Body Weight                                   |
| Al Naggar, 2014      | I=15<br>C=15           | **             | 18-33                         | ***                                        | Malaysia          | 2                      | ↓ Body Weight                                   |
| Azadbakht, 2005 [21] | I=38<br>C=40           | 30%M<br>70%F   | 41.2±12.3                     | ***                                        | Iran              | 28                     | ↓ Body Weight<br>↓ WC                           |
| Barr, 2000 [22]      | I=98<br>C=102          | 36%M/<br>64%F  | I=65.1±6.7C=<br>65.3±6.6      | 16-36                                      | Canada            | 12                     | ↑ Body Weight                                   |
| Buchowski, 2010 [24] | I=17<br>C=17           | 29%M<br>71%F   | 21-50                         | 29-35                                      | United States     | 12                     | ↔ Body Weight                                   |
| Chee, 2003 [18]      | I=91<br>C=82           | 100%F          | I=58.7±3.7<br>C=59±3.2        | 23.8±3.6                                   | Malaysia          | 108                    | ↔ Body Weight<br>↔ %Body Fat<br>↔ Lean Mass     |
| Dugan, 2014 [25]     | I=14<br>C=23           | 36%M<br>64%F   | 54±9.7                        | 94.4±19.9                                  | United States     | 16                     | ↔ Lean Mass<br>↓ Body Weight<br>↓ BMI<br>↓ WC   |
| Eagan, 2006 [32]     | I1=14<br>I2=14<br>C=10 | 100%M          | 20.1±2.4                      | I1=21.9±3.4<br>I2=23.4±4.7<br>C=21.9±2.6   | United States     | 78                     | ↓ Fat Mass                                      |
| Lau, 2001 [17]       | I=95<br>C=90           | 100%F          | I=57.1±1.8<br>C=56.8±1.5      | ***                                        | China             | 108                    | ↑Body Weight                                    |
| Liu, 2011 [26]       | I=12<br>C=12           | 100%F          | 24-31                         | 21-24                                      | China             | 29                     | ****                                            |
| Maki, 2015 [27]      | I=14<br>C=20           | 50%M<br>50%F   | 18-74                         | ≤45                                        | United States     | 14                     | ↑ Insulin<br>↔ Body Weight<br>↔ WC<br>↑ HOMA-IR |

|                      |              |               |                             |                           |               |    |                                                                    |
|----------------------|--------------|---------------|-----------------------------|---------------------------|---------------|----|--------------------------------------------------------------------|
| Palacios, 2011 [28]  | I=8<br>C=8   | 20%M<br>80%F  | 22-50                       | ≥30                       | Puerto Rico   | 21 | ↔ Body Weight<br>↔ BMI<br>↔ Lean Mass<br>↔ Fat Mass<br>↔ %Body Fat |
| Rideout, 2013 [29]   | I=23<br>C=23 | 20%M<br>80%F  | 18-75                       | 18.5-35.0                 | Canada        | 52 | ↓ Insulin<br>↓ HOMA-IR<br>↔ Body Weight                            |
| Sirtori, 1999* [19]  | 21           | 38%M<br>62%F  | 51.9±13.5                   | ***                       | Italy         | 4  | ****                                                               |
| Van Meijl, 2010 [30] | I=17<br>C=18 | 28%M<br>72%F  | 18-70                       | ≥27                       | Netherlands   | 8  | ↔ Body Weight                                                      |
| Wagner, 2007 [20]    | I=17<br>C=13 | 100%F         | I= 37.6± 2.2<br>C=36.0± 2.2 | I= 33.7±1.0<br>C=32.4±1.5 | United States | 12 | ↔ Body Weight<br>↔ Fat Mass                                        |
| Zemel, 2010* [34]    | I=10<br>C=10 | 70%M<br>30% F | 31.0±10.3                   | 28.0±1.01                 | United States | 12 | ↔ Body Weight                                                      |

\*Cross-over design; \*\*Data missing on sex; \*\*\*Data missing on BMI; \*\*\*\*Data missing on the outcome of body weight, waist circumference, or HOMA-IR. ↓= decrease; ↑ = increase; ↔ = no difference. Abbreviations: BMI, body mass index; C, control; F, female; HOMA-IR, Homeostatic Model Assessment of Insulin Resistance; I, intervention; M, male; SD, standard deviation; WC, waist circumference

**Figure S1. Funnel plot of All Studies Evaluating Dairy intake and Body Weight**

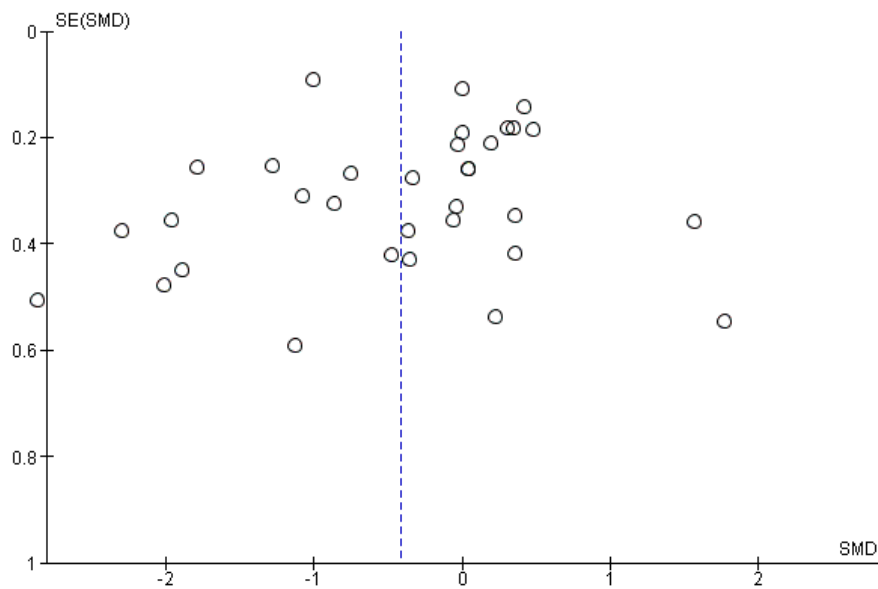

Figure S2. Funnel plot of All Studies Evaluating Dairy intake and Waist Circumference

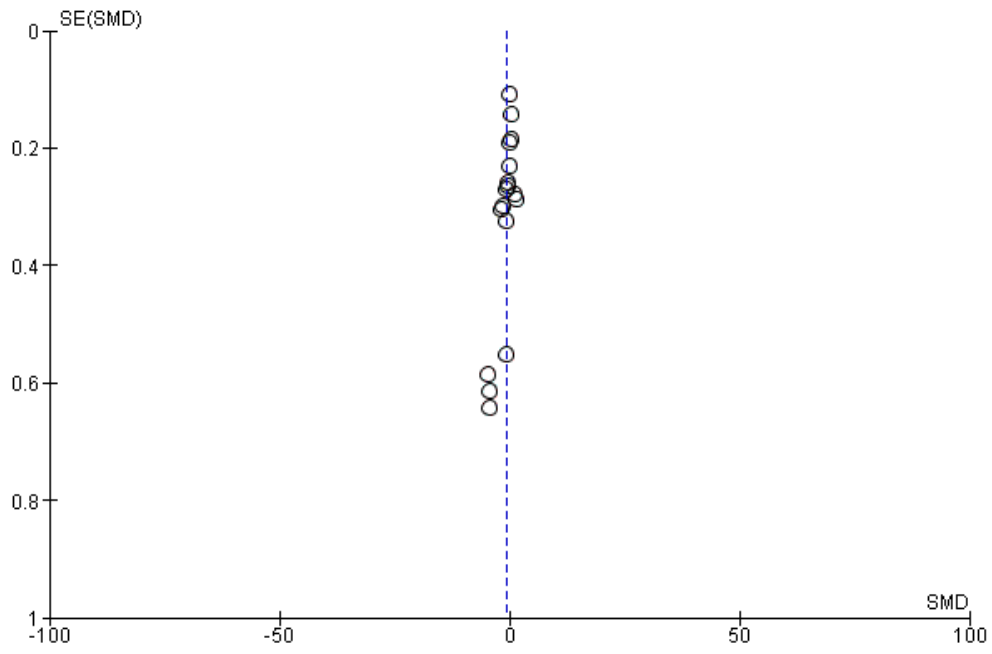

Figure S3. Funnel plot of All Studies Evaluating Dairy intake and HOMA-IR

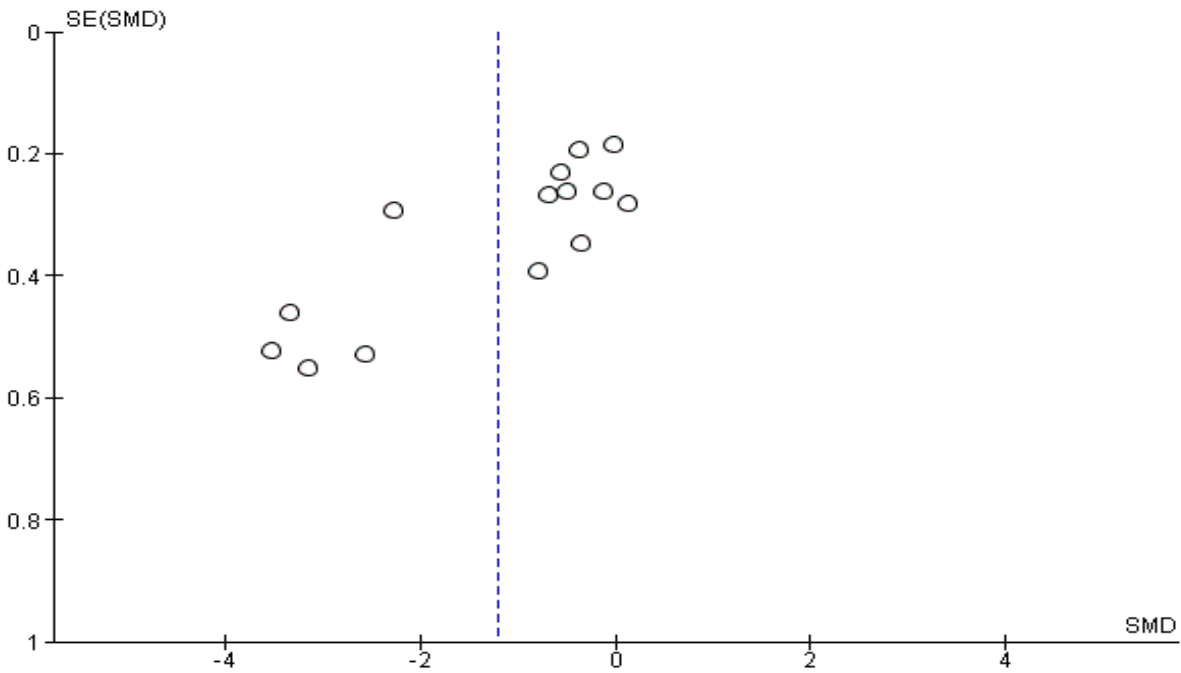

Figure S4. Forest Plot of Randomized Clinical Trials with Low Risk of Bias: Dairy Intake and HOMA-IR

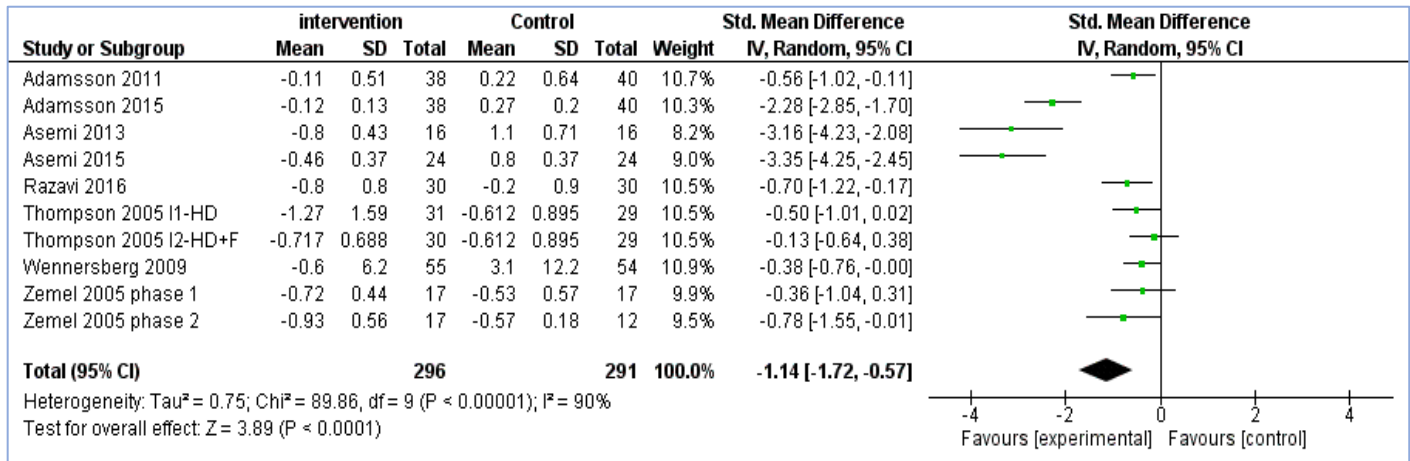

Abbreviations: F, fiber; HD, high dairy diet

**Figure S5. Forest Plot of Randomized Clinical Trials with Low Risk of Bias: Dairy Intake and Waist Circumference**

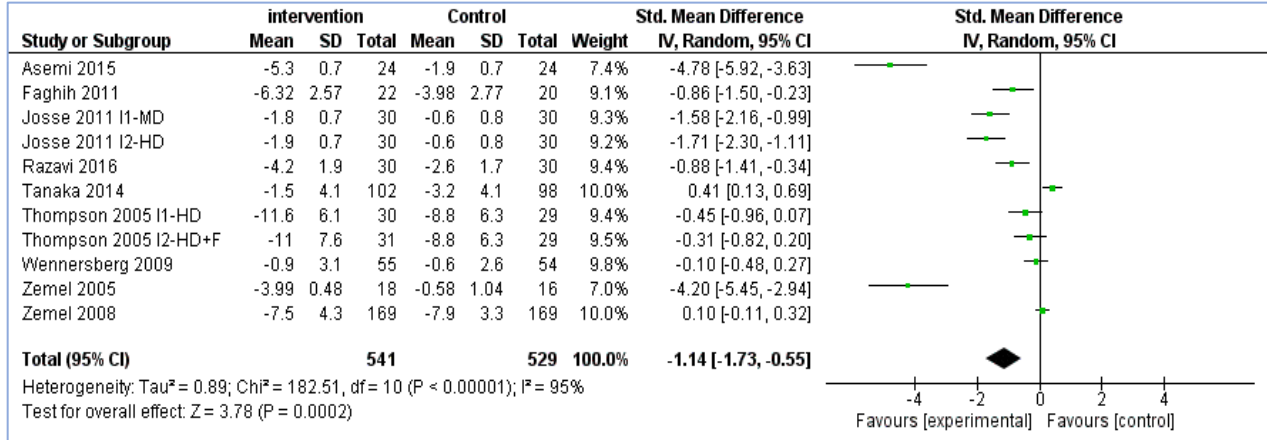

Waist circumference change measured in cm.

Abbreviations: F, fiber; HD, high dairy diet; MD, moderate dairy diet

**Figure S6. Forest Plot of Randomized Clinical Trials with Low Risk of Bias: Dairy Intake and Body Weight**

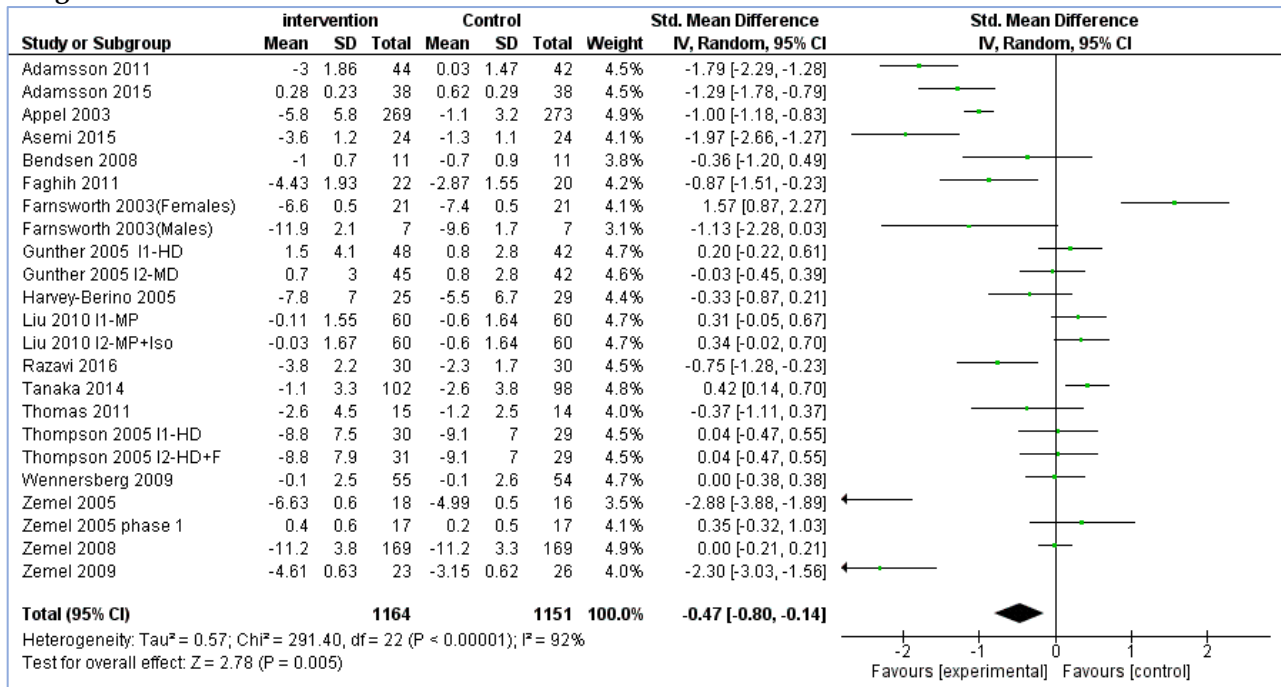

Body weight change measured in Kg.

Abbreviations: F, fiber; Iso, isoflavones; HD, high dairy diet; MD, moderate dairy diet; MP, milk protein

**Figure S7. Forest Plot of Randomized Clinical Trials without Physical Activity Component: Dairy Intake and HOMA-IR**

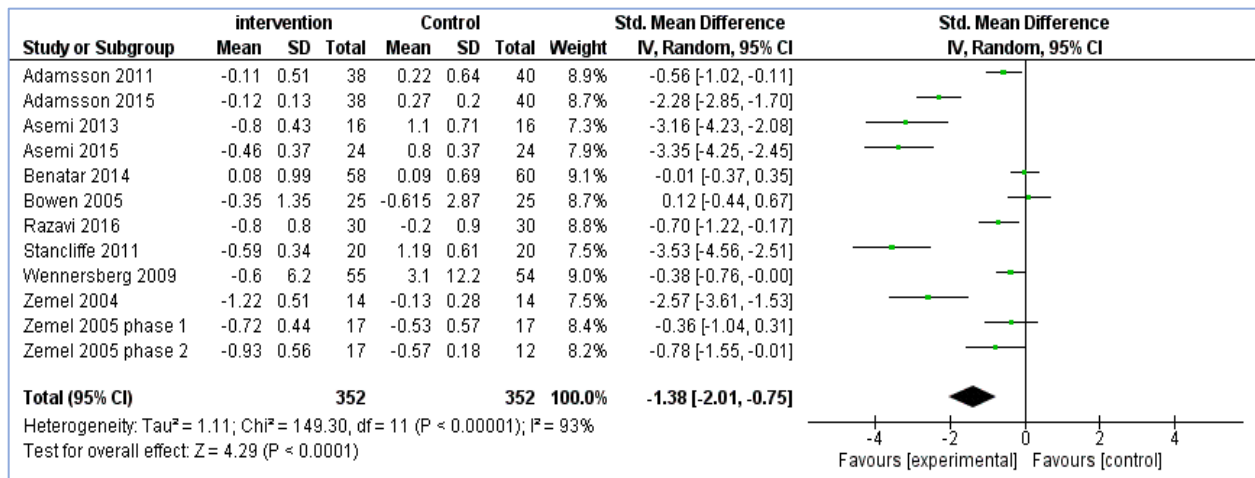

Figure S8. Forest Plot of Randomized Clinical Trials without Physical Activity Component: Dairy Intake and Waist Circumference

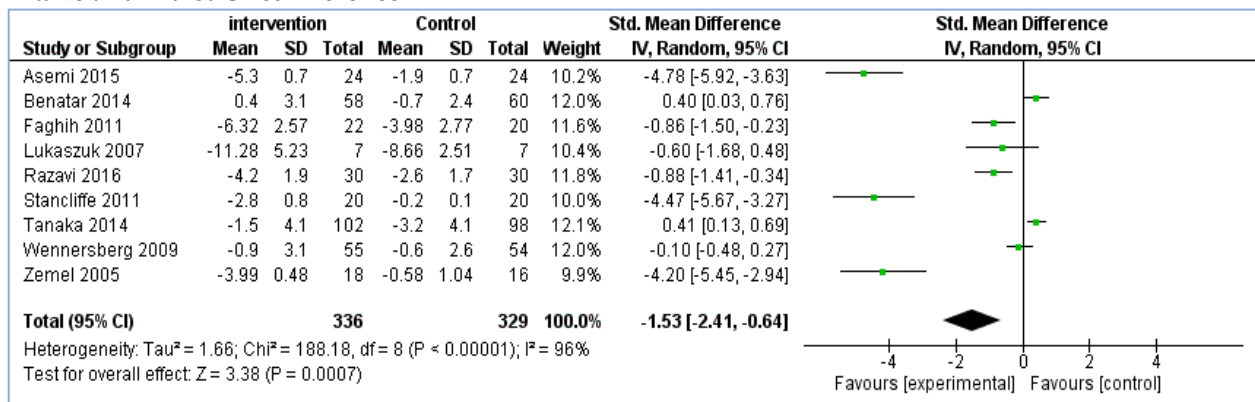

Waist circumference change measured in cm.

Figure S9. Forest Plot of Randomized Clinical Trials without Physical Activity Component: Dairy Intake and Body Weight

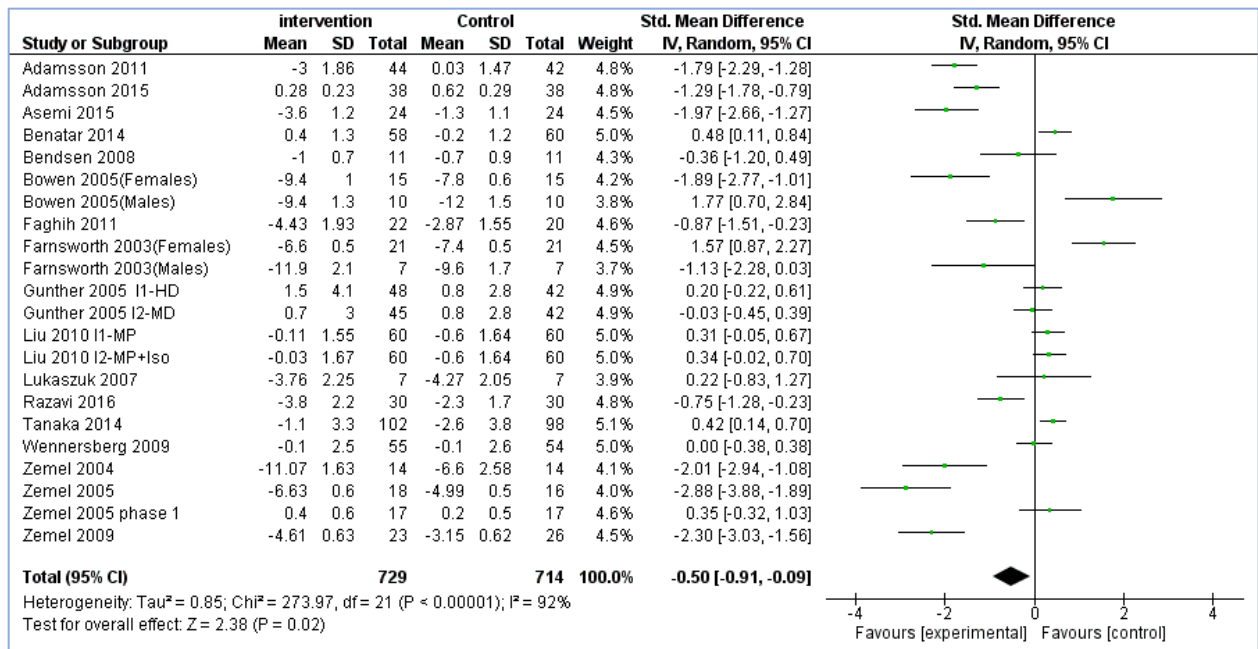

Body weight change measured in Kg.

Abbreviations: Iso, isoflavones; HD, high dairy diet; MD, moderate dairy diet; MP, milk protein
